# Supplementary material
Source: PubMed Central journal article supplement (PMC6527445)
Supplement: NIHMS1527220-supplement-1.pdf [file NIHMS1527220-supplement-1.pdf]

**Appendix**  
**Dietary Approaches to Stop Hypertension Diet Concordance and Incident Heart Failure: The Multi-Ethnic Study of Atherosclerosis**  
**Campos et al.**

**Appendix Table 1.** Average Food Servings per Day of DASH Dietary Components per DASH Quintile (N=4,478)

| <b>DASH quintile</b> | <b>Fruits<br/>n (SD)</b> | <b>Vegetables<br/>n (SD)</b> | <b>Whole grain<br/>n (SD)</b> | <b>Nuts<br/>n (SD)</b> | <b>Legumes<br/>n (SD)</b> | <b>Dairy<br/>n (SD)</b> | <b>Red meat<br/>n (SD)</b> | <b>Sweets<br/>n (SD)</b> | <b>Sodium<br/>n (SD)</b> |
|----------------------|--------------------------|------------------------------|-------------------------------|------------------------|---------------------------|-------------------------|----------------------------|--------------------------|--------------------------|
| 1                    | 1.5 (1.2)                | 2.2 (1.6)                    | 0.4 (0.5)                     | 0.4 (0.5)              | 0.4 (0.5)                 | 0.6 (0.9)               | 1.1 (0.7)                  | 1.5 (1.9)                | 1.5 (0.3)                |
| 2                    | 2.3 (1.6)                | 2.5 (1.5)                    | 0.6 (0.6)                     | 0.5 (0.6)              | 0.5 (0.6)                 | 0.9 (1.2)               | 0.8 (0.5)                  | 1.0 (1.5)                | 1.5 (0.3)                |
| 3                    | 2.6 (1.7)                | 2.7 (1.6)                    | 0.8 (0.7)                     | 0.6 (0.7)              | 0.6 (0.7)                 | 1.2 (1.6)               | 0.6 (0.5)                  | 0.7 (1.2)                | 1.4 (0.3)                |
| 4                    | 3.3 (2.1)                | 2.9 (1.7)                    | 1.0 (0.8)                     | 0.6 (0.6)              | 0.6 (0.6)                 | 1.6 (0.5)               | 0.5 (0.3)                  | 0.5 (0.9)                | 1.4 (0.3)                |
| 5                    | 4.1 (2.1)                | 3.2 (1.6)                    | 1.3 (0.8)                     | 0.7 (0.7)              | 0.7 (0.7)                 | 1.6 (1.4)               | 0.2 (0.5)                  | 0.2 (0.5)                | 1.3 (0.3)                |

DASH, Dietary Approaches to Stop Hypertension.

**Appendix**  
**Dietary Approaches to Stop Hypertension Diet Concordance and Incident Heart Failure: The Multi-Ethnic Study of Atherosclerosis**  
**Campos et al.**

**Appendix Table 2.** Unadjusted Heart Failure Incidence Rate, per 1,000 Person-years, According to DASH Diet Score Quintiles and Age Categories (N=4,478)

| <b>Variable</b>   | <b>Q1 (95% CI)</b> | <b>Q2 (95% CI)</b> | <b>Q3 (95% CI)</b> | <b>Q4 (95% CI)</b> | <b>Q5 (95% CI)</b> |
|-------------------|--------------------|--------------------|--------------------|--------------------|--------------------|
| Entire population | 3.0 (2.1, 4.2)     | 4.1 (3.0, 5.5)     | 3.8 (2.8, 5.2)     | 3.1 (2.3, 4.4)     | 3.0 (2.1, 4.4)     |
| Age 45–74 years   | 2.7 (1.8, 3.9)     | 3.8 (2.8, 5.3)     | 2.6 (1.8, 3.9)     | 2.2 (1.5, 3.4)     | 1.4 (0.8, 2.6)     |
| Age 75–84 years   | 8.3 (3.5, 20.0)    | 7.7 (3.2, 18.6)    | 15.1 (9.2, 24.6)   | 8.6 (5.1, 14.5)    | 10.9 (6.8, 17.6)   |

DASH, Dietary Approaches to Stop Hypertension; Q, quintile.

**Appendix**  
**Dietary Approaches to Stop Hypertension Diet Concordance and Incident Heart Failure: The Multi-Ethnic Study of Atherosclerosis**  
**Campos et al.**

**Appendix Table 3.** Heart Failure Incidence Rate for Those Aged 45–74 Years at Baseline, per 1,000 Person-years, According to DASH Diet Score Quintiles and Selected Participant Characteristics (N=3,809)

| <b>Variable</b>   | <b>Q1 (95% CI)</b> | <b>Q2 (95% CI)</b> | <b>Q3 (95% CI)</b> | <b>Q4 (95% CI)</b> | <b>Q5 (95% CI)</b> | <b>p-trend</b> |
|-------------------|--------------------|--------------------|--------------------|--------------------|--------------------|----------------|
| <b>Sex</b>        |                    |                    |                    |                    |                    |                |
| Male              | 2.8 (1.7, 4.4)     | 5.3 (3.6, 7.8)     | 3.2 (1.9, 5.2)     | 3.3 (1.8, 5.9)     | 2.0 (0.8, 5.2)     | 0.144          |
| Female            | 1.5 (0.6, 3.5)     | 2.3 (1.2, 4.3)     | 2.0 (1.0, 3.8)     | 3.0 (1.7, 3.0)     | 0.9 (0.4, 2.3)     | 0.485          |
| <b>Race</b>       |                    |                    |                    |                    |                    |                |
| White             | 2.4 (1.1, 4.9)     | 4.5 (2.7, 7.3)     | 2.0 (1.0, 3.9)     | 3.0 (1.7, 5.2)     | 1.0 (0.4, 2.7)     | <b>0.039</b>   |
| Chinese American  | 1.3 (0.3, 5.0)     | 1.5 (0.4, 6.0)     | 0.7 (0.1, 4.9)     | 0.0                | 2.1 (0.3, 10.9)    | 0.513          |
| African American  | 3.4 (1.9, 6.1)     | 3.2 (1.5, 6.7)     | 5.0 (2.7, 9.3)     | 3.4 (1.6, 7.1)     | 0.7 (0.1, 5.1)     | 0.231          |
| Hispanic American | 1.4 (0.5, 4.4)     | 5.1 (2.8, 9.2)     | 2.8 (1.2, 6.1)     | 0.5 (0, 3.4)       | 2.0 (0.6, 6.1)     | 0.027          |
| <b>Age, years</b> |                    |                    |                    |                    |                    |                |
| 45–54             | 1.1 (0.4, 2.5)     | 1.1 (0.4, 2.9)     | 0.8 (0.3, 2.5)     | 0.3 (0.0, 2.7)     | 1.1 (0.3, 4.6)     | 0.737          |
| 55–64             | 2.1 (1.0, 4.4)     | 4.3 (2.5, 7.4)     | 2.1 (1.0, 4.4)     | 2.6 (1.3, 4.0)     | 0.8 (0.2, 3.5)     | 0.139          |
| 65–74             | 5.8 (3.3, 12.0)    | 7.3 (4.7, 11.0)    | 5.6 (3.4, 9.3)     | 3.7 (2.1, 6.7)     | 1.5 (0.6, 3.6)     | <b>0.005</b>   |
| <b>BMI</b>        |                    |                    |                    |                    |                    |                |
| <30               | 2.2 (1.3, 3.7)     | 4.0 (2.7, 5.8)     | 2.6 (1.7, 3.2)     | 1.8 (1.1, 3.3)     | 0.7 (0.3, 1.9)     | <b>0.008</b>   |
| ≥30               | 2.5 (1.3, 4.9)     | 3.6 (1.9, 6.6)     | 2.5 (1.1, 5.2)     | 3.1 (1.5, 6.2)     | 3.1 (1.6, 7.9)     | 0.928          |
| <b>Diabetes</b>   |                    |                    |                    |                    |                    |                |
| No                | 2.0 (1.2, 3.1)     | 2.8 (1.8, 4.2)     | 2.0 (1.3, 3.2)     | 1.6 (1.0, 2.7)     | 0.7 (0.3, 1.8)     | <b>0.043</b>   |
| Yes               | 6.2 (2.6, 15.0)    | 12.4 (7.2, 21.4)   | 6.9 (3.5, 13.8)    | 7.8 (3.7, 16.3)    | 6.6 (2.5, 17.5)    | 0.601          |

DASH, Dietary Approaches to Stop Hypertension; Q, quintile.

**Appendix**  
**Dietary Approaches to Stop Hypertension Diet Concordance and Incident Heart Failure: The Multi-Ethnic Study of Atherosclerosis**  
**Campos et al.**

**Appendix Table 4.** Adjusted (Model 4) Hazard Ratios of Selected DASH Food Groups With Incident HF in the Entire Population and Those Aged <75 Years

| Variable                    | Q1          | Q2             | Q3             | Q4             | Q5             | <i>p</i> -trend |
|-----------------------------|-------------|----------------|----------------|----------------|----------------|-----------------|
|                             | HR (95% CI) | HR (95% CI)    | HR (95% CI)    | HR (95% CI)    | HR (95% CI)    |                 |
| <b>Low fat dairy</b>        |             |                |                |                |                |                 |
| Entire population (N=4,436) | ref         | 1.0 (0.7, 1.6) | 0.8 (0.5, 1.2) | 0.6 (0.4, 1.2) | 0.6 (0.4, 1.0) | 0.109           |
| Age 45–74 years (N=3,874)   | ref         | 1.4 (0.8, 2.4) | 0.8 (0.5, 1.5) | 0.6 (0.3, 1.1) | 0.5 (0.2, 0.9) | <b>0.002</b>    |
| <b>Meat</b>                 |             |                |                |                |                |                 |
| Entire population           | ref         | 1.2 (0.7, 1.8) | 0.9 (0.7, 1.8) | 0.8 (0.5, 1.3) | 0.6 (0.4, 1.1) | 0.172           |
| Age 45–74 years             | ref         | 1.2 (0.7, 2.1) | 1.2 (0.7, 2.0) | 0.8 (0.4, 1.4) | 0.5 (0.2, 1.0) | 0.092           |
| <b>Nuts and legumes</b>     |             |                |                |                |                |                 |
| Entire population           | ref         | 1.8 (1.0, 3.2) | 1.6 (0.9, 2.8) | 1.2 (0.6, 2.1) | 2.1 (1.2, 3.6) | <b>0.03</b>     |
| Age 45–74 years             | ref         | 1.6 (0.9, 3.0) | 1.4 (0.7, 2.7) | 0.9 (0.5, 1.9) | 1.6 (0.8, 3.1) | 0.243           |

DASH, Dietary Approaches to Stop Hypertension; HF, heart failure; HR, hazard ratio; Q, quintile.

**Appendix**  
**Dietary Approaches to Stop Hypertension Diet Concordance and Incident Heart Failure: The Multi-Ethnic**  
**Study of Atherosclerosis**  
**Campos et al.**

**Appendix List 1.** Food items.

apples, orange and other juice, lettuce, spinach, potato, dark bread, crackers, chips, cheddar and cottage cheese, yogurt, hamburger, ham, chili, sausage, chocolate and white doughnuts
